# Supplementary material
Source: publisher figshare collection journal article supplement (https://tandf.figshare.com/ndownloader/files/17163605)
Supplement: Supplementary file 1 [file 17163605]

**Supporting Information**

Synthesis and characterization of a new 4-styrylpyridine based square planar copper(II) complex: Exploration of phenoxazinone synthase-mimicking activity and DFT study

AKHTARUZZAMAN, SAMIM KHAN, BASUDEB DUTTA, SOBHY M. YAKOUT, SHEBL S. IBRAHIM and MOHAMMAD HEDAYETULLAH MIR*


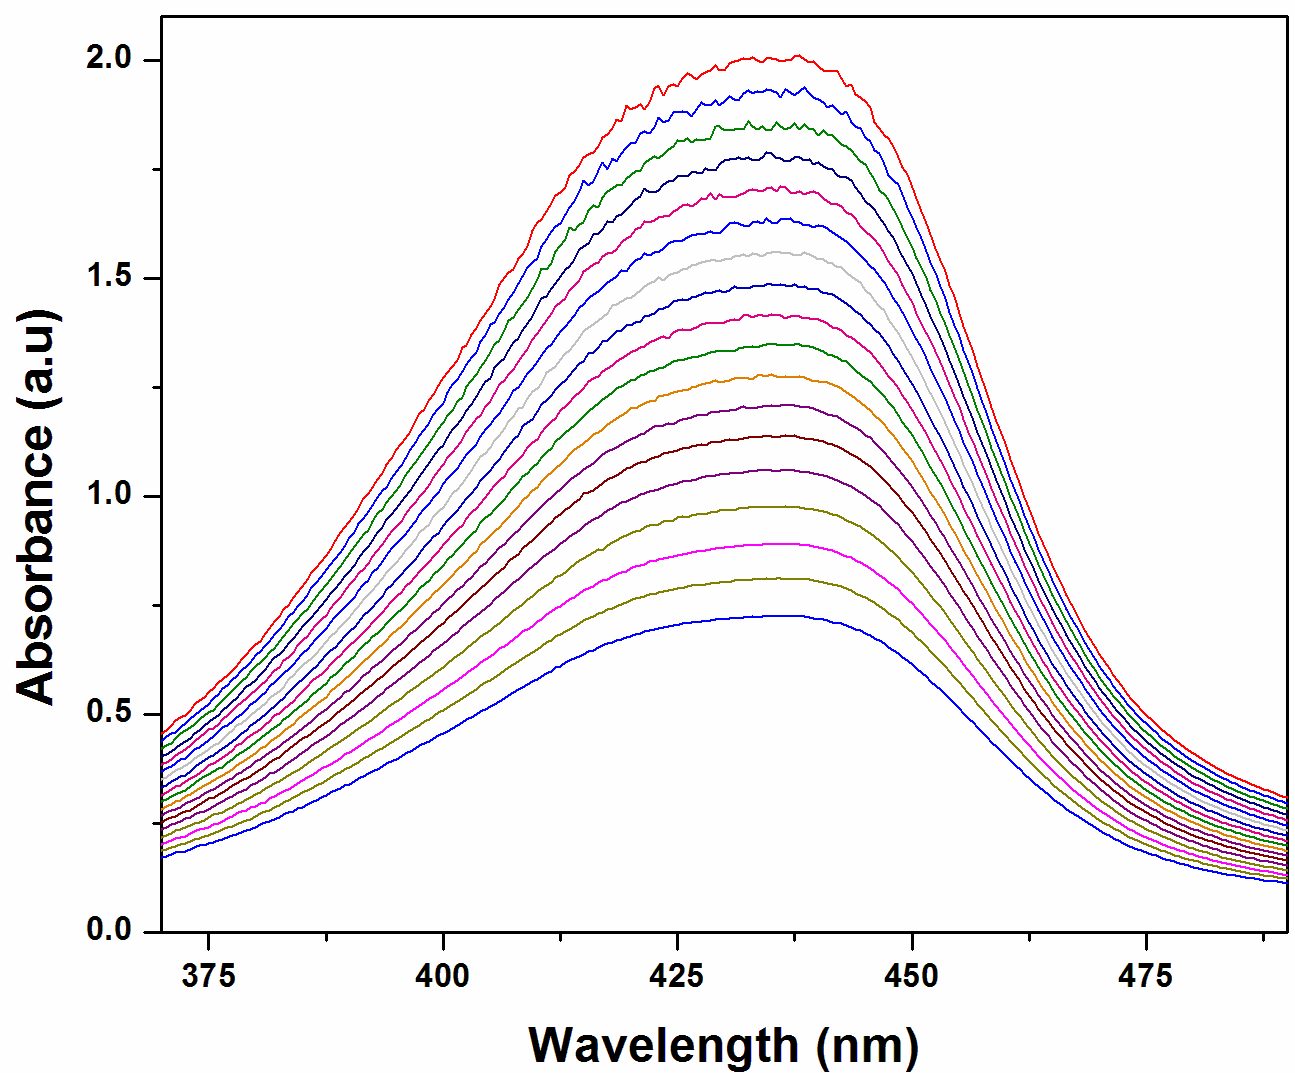


Figure S1. The time dependent spectral growth for catalytic oxidation of OAPH in 20% methanol.

**
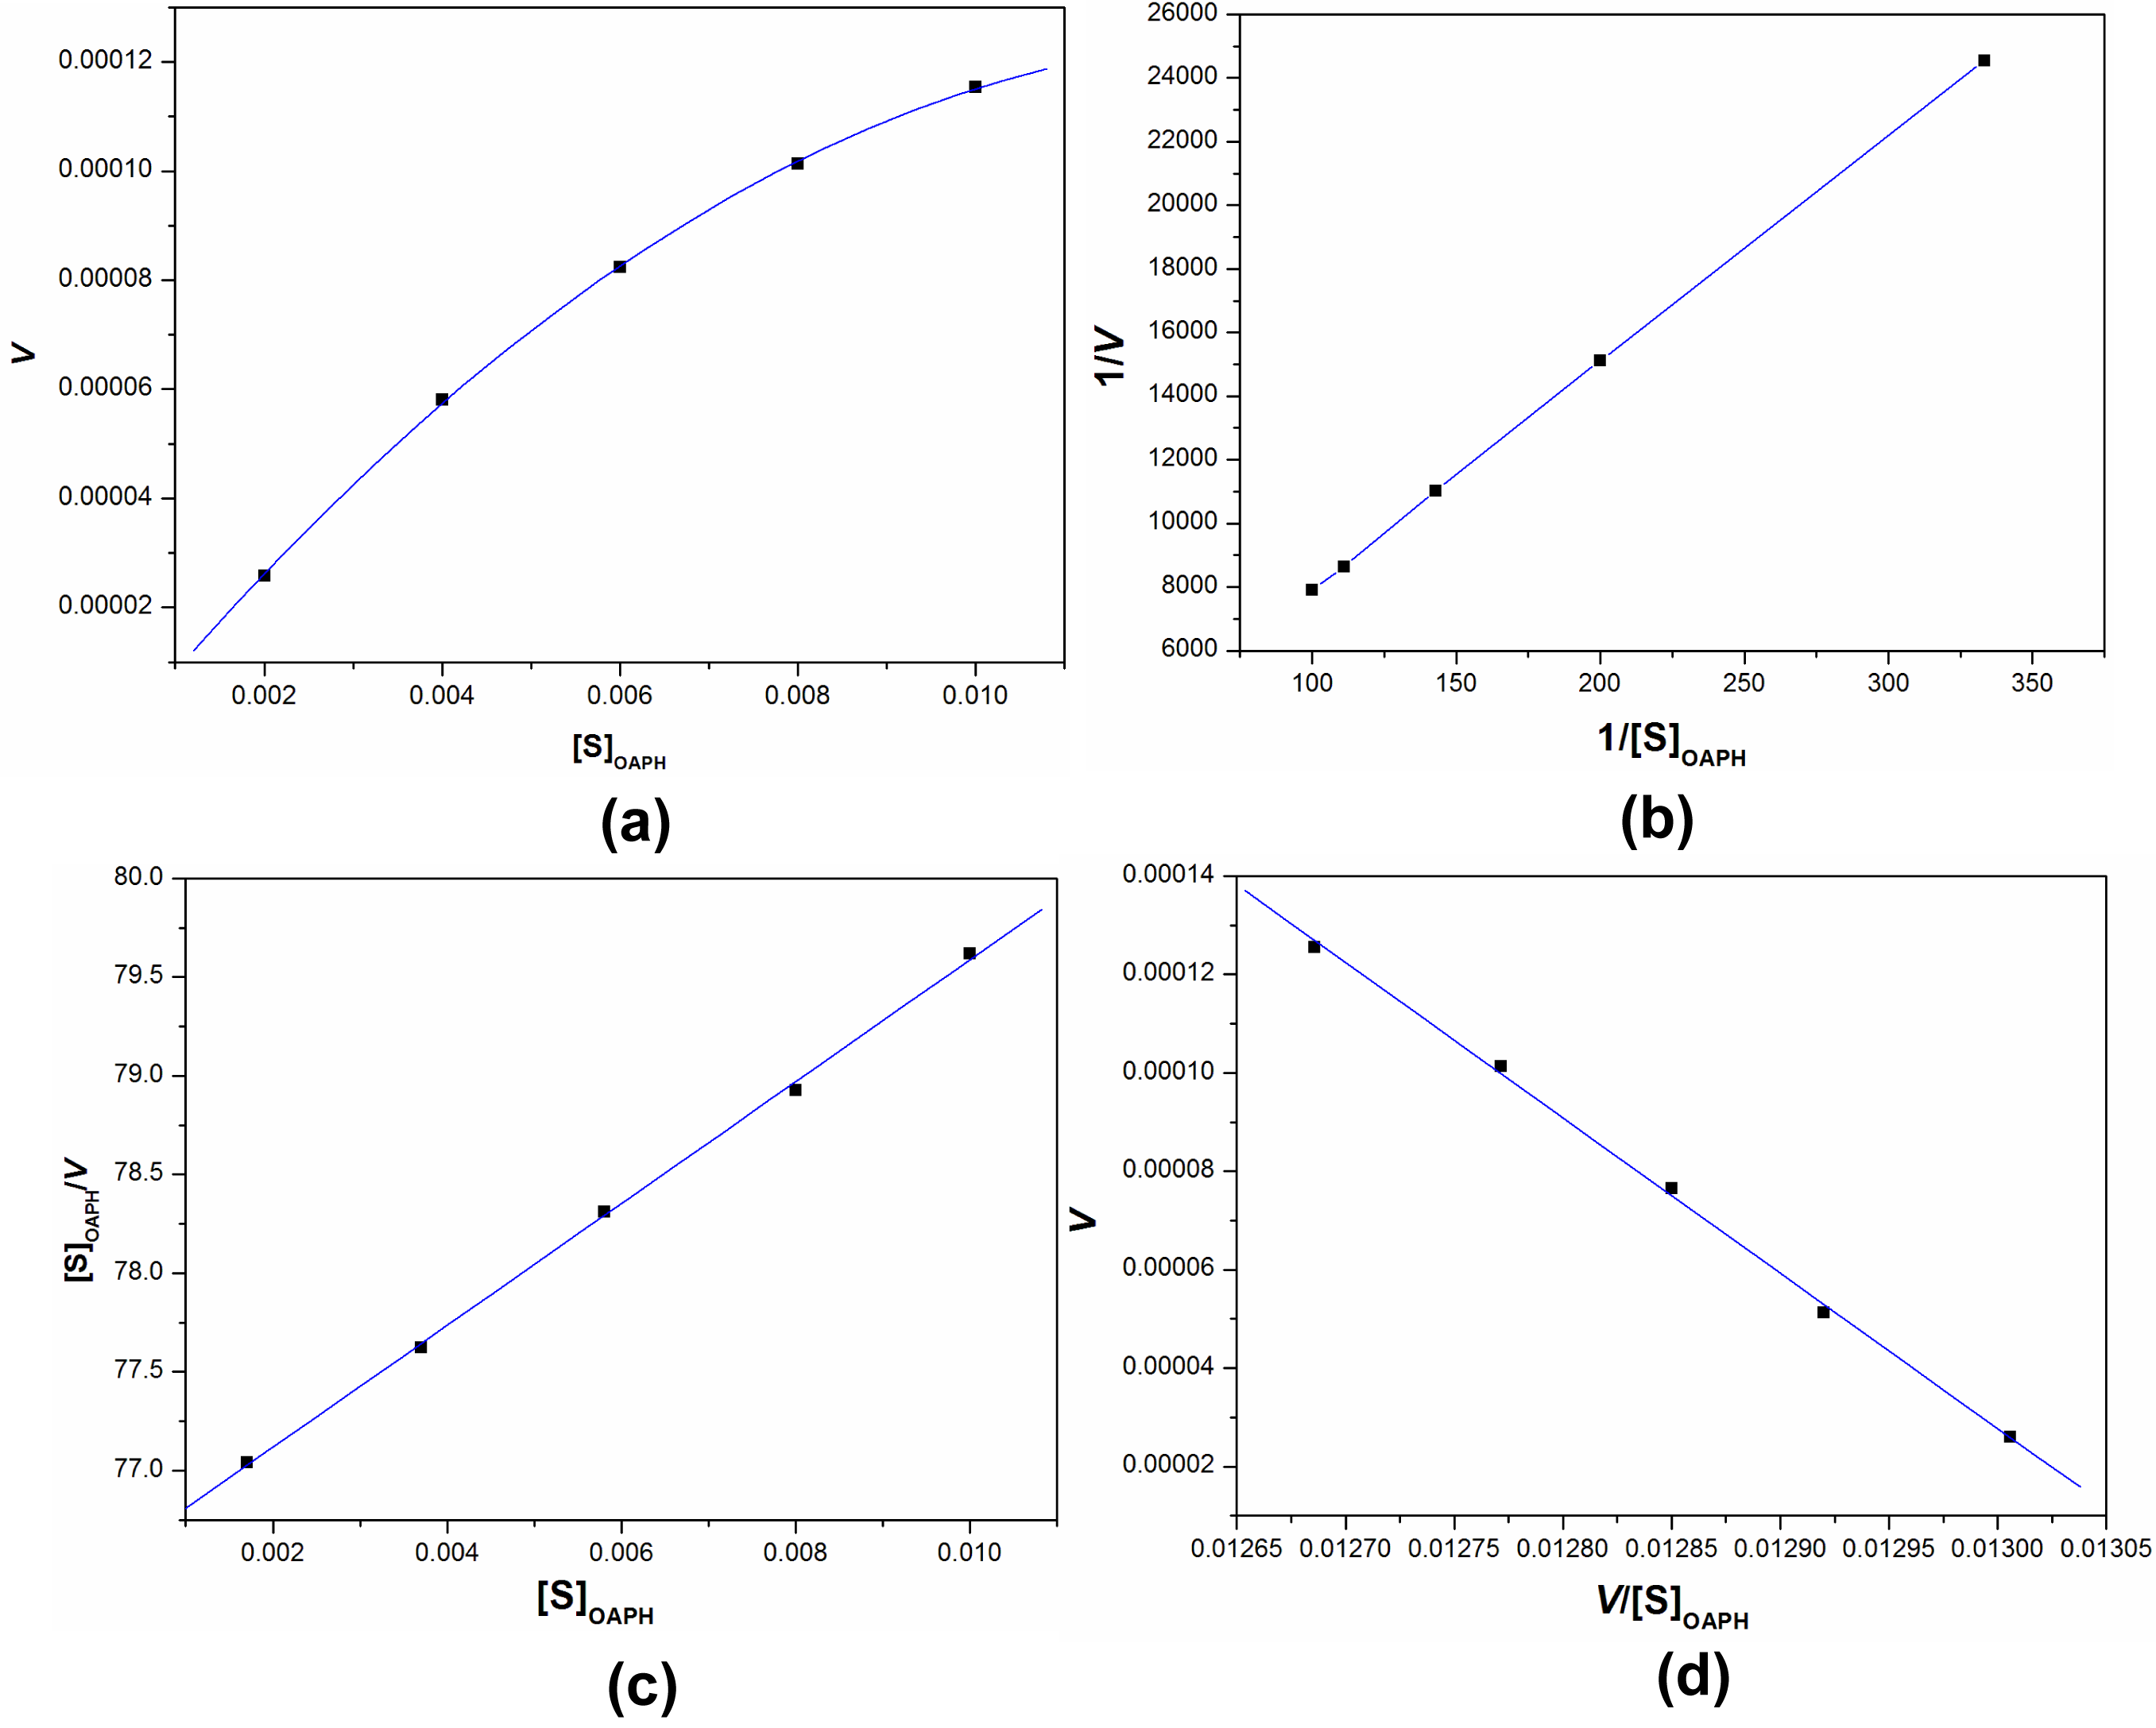
**

Figure S2. Michaelis-Menten plot (a), Lineweaver-Burk plot (b), Hanes-Woolf plot (c) and Eadie-Hofstee plot (d) for catalytic oxidation of OAPH in 20% methanol.

Table S1. Selected bond lengths (Å) in **1**

| Cu(2)-N(3) | 2.031(2) |
| --- | --- |
| Cu(2)-N(4) | 1.942(2) |
| Cu(2)-N(3)a | 2.031(2) |
| Cu(2)-N(4)a | 1.942(2) |
| Cu(1)-N(2)b | 1.941(2) |
| Cu(1)-N(1)b | 2.031(2) |
| Cu(1)-N(1) | 2.031(2) |
| Cu(1)-N(2) | 1.941(2) |

Symmetry transformations used to generate equivalent atoms: a = 1-x,-y, 2-z; b = 1-x,1-y,1-z

Table S2. Selected bond angles (°) in **1**.

| N(3)-Cu(2)-N(4) | 89.99(10) |
| --- | --- |
| N(3)-Cu(2)-N(3)a | 180.00 |
| N(3)-Cu(2)-N(4)a | 90.01(10) |
| N(3)a-Cu(2)-N(4) | 90.01(10) |
| N(4)-Cu(2)-N(4)a | 180.00 |
| N(3)a-Cu(2)-N(4)a | 89.99(10) |
| N(1)-Cu(1)-N(2)b | 89.97(10) |
| N(1)b-Cu(1)-N(2) | 89.97(10) |
| N(2)-Cu(1)-N(2)b | 180.00 |
| N(1)b-Cu(1)-N(2)b | 90.03(10) |
| N(1)-Cu(1)-N(1)b | 180.00 |
| N(1)-Cu(1)-N(2) | 90.03(10) |

Symmetry transformations used to generate equivalent atoms: a = 1-x, -y, 2-z; b = 1-x, 1-y, 1-z

Table S3. Geometric features (distances, Å and angles,) of the π···π stacking interactions in **1**.

| Cg(Ring I)···Cg(Ring J) | Cg···Cg(Å) | α (°) | Cg(I)···Perp(Å) | Cg(J)···Perp(Å) |
| --- | --- | --- | --- | --- |
| Cg(1)···Cg(2)a | 3.7912(17) | 6.70 | 3.445 | 3.445 |
| Cg(1)···Cg(4)c | 3.949(3) | 21.17 | 3.488 | 3.488 |
| Cg(2)···Cg(3)d | 3.9627(17) | 28.32 | 3.778 | 3.488 |
| Cg(3)···Cg(4)e | 3.7900(17) | 18.22 | 3.447 | 3.600 |

Symmetry transformations: a = -1+x, y, z; c = x, -1+y, z; d = x, y, z; e = 1-x, 2-y, 1-z. α = dihedral angle between ring I and ring J. Cg(I)···Perp = perpendicular distance of Cg(I) on ring J. Cg(J)···Perp = perpendicular distance of Cg(J) on ring I. Cg(1) = center of gravity of the ring [N(3)-C(1)-C(2)-C(3)-C(4)-C(5)]; Cg(2) = center of gravity of the ring [C(8)-C(9)-C(10)-C(11)-C(12)-C(13)]; Cg(3) = center of gravity of the ring [N(1)-C(15)-C(16)-C(17)-C(18)-C(19)]; Cg(4) = center of gravity of the ring [C(22)-C(23)-C(24)-C(25)-C(26)-C(27)].

Table S4. Kinetic parameters of **1** for phenoxazinone synthase mimicking activity using various enzyme kinetic plots at 25 C in 20% methanol.

| Enzyme kinetic plots | *V*max (M s-1) | *K*M (M) | *k*cat (s-1) | *k*cat/*KM* (s-1 M-1) |
| --- | --- | --- | --- | --- |
| Michaelis-Menten plot | 65.41×10-5 | 282.26×10-3 | 65.4×10-2 | 2.317 |
| Lineweaver-Burk plot | 12.46×10-5 | 312.79×10-3 | 72.6×10-2 | 2.321 |
| Hanes-Woolf plot | 70.42×10-5 | 304.36×10-3 | 70.4×10-2 | 2.313 |
| Eadie-Hofstee plot | 6.73×10-5 | 290.71×10-3 | 67.3×10-2 | 2.315 |

Table S5. A comparison of turnover number (*kcat*) values of some copper complexes available in the literature for the conversion of *o*-aminophenol to the corresponding phenoxazinone.

| Complexes | Solvent | *kcat* (h-1) | References |
| --- | --- | --- | --- |
| [Cu2L2Cl2] | Methanol | 1.065×103 | [51] |
| [Cu2L2Cl2] | Acetonitrile | 2.13×103 | [51] |
| [Cu4(L1)4] | Methanol | 1.21×105 | [52] |
| [Cu(bpy)Cl2] | Methanol | 2.08×103 | [53] |
| [Cu(µ-Cl)(phen)Cl]2 | Methanol | 2.08×103 | [53] |
| [Cu4(L2)4] | Methanol | 86.3 | [54] |
| [Cu4(L3)4] | Methanol | 3.40×102 | [54] |
| [(CuL4)2(µ1,1-N3)2Cu(H2O)]·CH3OH | Methanol | 1.25×102 | [55] |
| [(CuL5)2(µ1,1-N3)2Cu(H2O)]·CH3OH | Methanol | 1.18×102 | [55] |
| [(CuL6)2(µ1,1-N3)2Cu(H2O)]·2CH3OH | Methanol | 1.14×102 | [55] |
| **This work** | Methanol | 1.8×103 | - |
| **This work** | 20% Methanol | 2.3×103 | - |

*HL* = 2-((E)-(2-(benzylthio)ethylimino)methyl)phenol; *H2L1* = N-(2-hydroxyethyl)-3-methoxysalicylaldimine; bpy=2,2’-bipyridine; phen=1,10-phenanthroline; *H2L2* = (4-chloro-2-(hydroxy(thiazol-2-ylamino)methyl)phenol); H2L3 = (4-bromo-2-(hydroxy(thiazol-2-ylamino)methyl)phenol); H2L4 = N,N-bis(3,5-dimethyl-2-hydroxybenzyl)-N’,N’-dimethyl-1,3-diaminopropane; H2L5 = N,N-bis(3,5-dimethyl-2-hydroxybenzyl)-N’,N’-dimethyl-1,2-diaminoethane; H2L6 = N,N-bis(3,5-dimethyl-2-hydroxybenzyl)-N’,N’-diethyl-1,2-diaminoethane.

Table S6. The orbital composition distribution of different HOMO and LUMO and their energy (in eV).

| 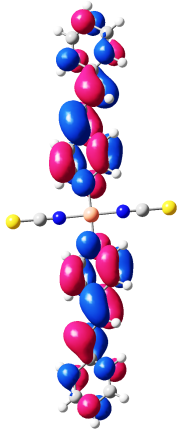 | 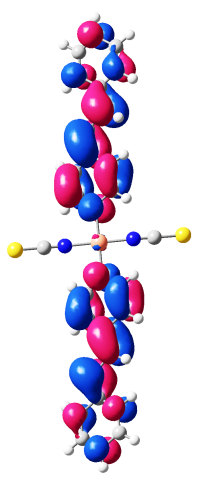 | 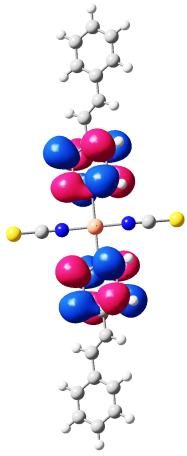 | 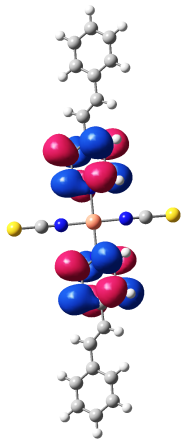 | 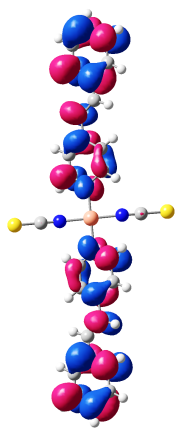 |
| --- | --- | --- | --- | --- |
| LUMO  -2.71 eV | LUMO+1  -2.66 eV | LUMO+2  -1.23 eV | LUMO+3  -1.18 eV | LUMO+4  -0.92 eV |
| 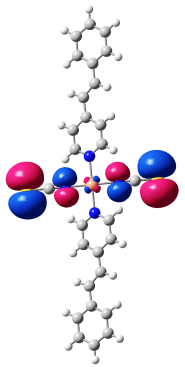 | 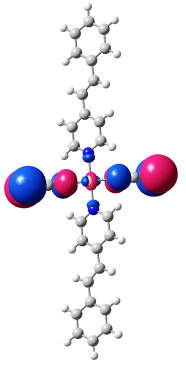 | 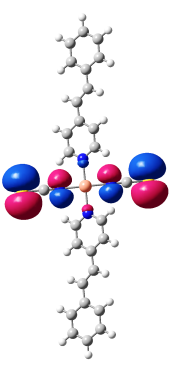 | 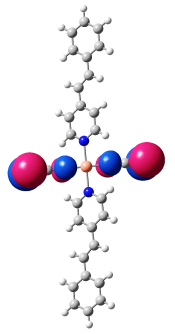 | 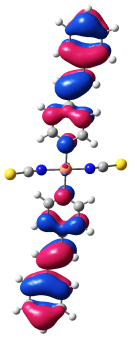 |
| HOMO  -5.70 eV | HOMO-1  -5.71 eV | HOMO-2  -5.76 eV | HOMO-3  -5.85 eV | HOMO-4  -6.59 eV |
